# Supplementary material for: Associations between illness duration and health-related quality of life in specified mental and physical chronic health conditions: results from a population-based survey
Source: Springer Nature journal article supplement (doi:10.1007/s11136-017-1592-7), 2017-05-12
Supplement: MOESM1 [file 12283898]

## Sheet: Sheet1
Questions to ascertain the presence of physical health conditions	N with condition
The next few questions are about health conditions you may have.
Have you ever been told by a doctor or nurse that you have asthma? (Yes/No)	1736
Have you ever had a stroke? (Yes/No)	179
Have you ever been told by a doctor or nurse that you have any (other) heart or circulatory condition like a heart attack, angina or high blood pressure? (Yes/No)	1871
Have you ever been told by a doctor or nurse that you have gout, rheumatism or arthritis? (Yes/No)	1759
Have you ever been told by a doctor or nurse that you have diabetes or high sugar levels in your blood or urine? (Yes/No)	662
DSM-IV lifetime diagnoses to ascertain the presence of mental health conditions
Anxiety (one or more of the following)	1785
Generalised anxiety disorder	697
Agoraphobia with or without panic disorder	202
Panic disorder	313
Obsessive compulsive disorder	333
Social anxiety disorder	742
Depression (one or more of the following)	1473
Major depressive disorder or episode	1307.98
Minor depressive disorder	91
Recurrent brief depression disorder	95.7409
Dysthymia	264.867
Bipolar disorder (either one)	119
Bipolar disorder type 1	64
Bipolar disorder type 2	55
