# Supplementary material for: Associations between illness duration and health-related quality of life in specified mental and physical chronic health conditions: results from a population-based survey
Source: Springer Nature journal article supplement (doi:10.1007/s11136-017-1592-7), 2017-05-12
Supplement: MOESM3 [file 12280954]

Interactions between illness duration and age in their effect on health-related quality of life (HRQOL) (N=8841). Solid coloured lines represent deviations of HRQOL in illness duration categories from the reference group (those without the conditions, dashed lines). Estimates are adjusted for age, gender, main language spoken, occupation group, education level, marital status, body mass index, smoking, self-reported mental and physical health, functional impairment, and number of self-reported long-term health conditions.

|  |  |
| --- | --- |
|  |  |
|  |  |
|  | |
